# Supplementary material
Source: HighWire-hosted journal article supplement (https://jech.bmj.com/content/75/1/76)
Supplement: inline-supplementary-material-1 [file inline-supplementary-material-1.pdf]

## Supplementary information

### Box S1. Model parametrisation [1, 2]

Let  $n_{jk}(t)$ , the number of bronchiolitis admissions in IMD group  $j$  and year  $k$  observed at time  $t$  (measured in weeks), follow a Poisson distribution with rate  $\lambda_{jk}(t) = E(n_{jk}(t))/N_{jk}(t)$  where  $N_{jk}(t)$  denote the person-time at risk in IMD group  $j$  and year  $k$  at time  $t$ . We modelled this rate, after log-transformation, as a function of year and time of admission as follows:

$$\begin{aligned} \log(\lambda_{jk}(t)) = & \beta_0 + \beta_1(\sin(2\pi t/T)) + \beta_2(\cos(2\pi t/T)) + \sum_{j=1}^5 \alpha_j I_{\text{IMD}=j} + \sum_{j=1}^5 \delta_{1j} \sin(2\pi t/T) I_{\text{IMD}=j} \\ & + \sum_{j=1}^5 \delta_{2j} \cos(2\pi t/T) I_{\text{IMD}=j} + \sum_{k=1}^3 \theta_k I_{\text{age}=k} + \sum_{k=1}^3 \theta_k \sin(2\pi t/T) I_{\text{age}=k} \\ & + \sum_{k=1}^3 \theta_k \cos(2\pi t/T) I_{\text{age}=k} + \sum_{k=1}^K \theta_k I_{x=k} \end{aligned}$$

Where:  $T$  is the length of period within one harmonic cycle (i.e. 1 year = 52.14 weeks); and  $I_{X=x}$  is the binary indicator of the covariates  $X$  taking value  $x$ ;  $K$  indicates the number of covariates included in the model (e.g. sex and year categories). The parameter  $\beta_0$  is the intercept,  $\beta_1$  and  $\beta_2$  are harmonic function coefficients,  $\delta_{1j}$  and  $\delta_{2j}$  are IMD group-specific harmonic function coefficients, and the parameters  $\alpha_1, \delta_{11}, \delta_{21}$  and  $\theta_1$  are all constrained to be zero to deal with the collinearity of the binary indicators.

Figure S1. Flow diagram to show study participant and hospital admission selection

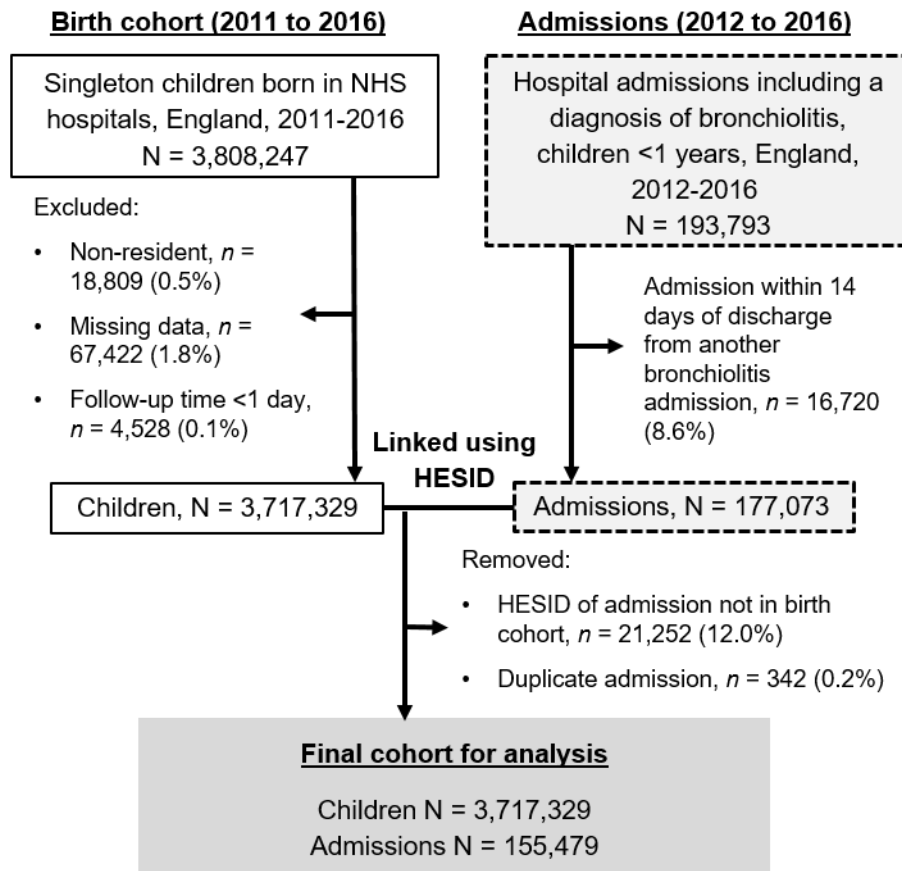

Table S1. Hospital admissions in children <1 year olds, total and due to bronchiolitis, by year and month:  
England, 2012-2016

|              |                  | <b>Any<br/>condition<br/>(N)</b> | <b>Bronchiolitis<br/>(N)</b> | <b>Proportion<br/>of all (%)</b> |
|--------------|------------------|----------------------------------|------------------------------|----------------------------------|
| <b>Year</b>  | <b>2012</b>      | 262,411                          | 37,136                       | 14.2                             |
|              | <b>2013</b>      | 252,053                          | 34,264                       | 13.6                             |
|              | <b>2014</b>      | 250,454                          | 35,982                       | 14.4                             |
|              | <b>2015</b>      | 255,866                          | 41,408                       | 16.2                             |
|              | <b>2016</b>      | 271,865                          | 45,003                       | 16.6                             |
| <b>Month</b> | <b>January</b>   | 112,008                          | 24,116                       | 21.5                             |
|              | <b>February</b>  | 104,485                          | 13,787                       | 13.2                             |
|              | <b>March</b>     | 113,802                          | 11,647                       | 10.2                             |
|              | <b>April</b>     | 101,518                          | 8,077                        | 8.0                              |
|              | <b>May</b>       | 100,649                          | 6,238                        | 6.3                              |
|              | <b>June</b>      | 93,729                           | 4,004                        | 4.3                              |
|              | <b>July</b>      | 96,421                           | 3,432                        | 3.6                              |
|              | <b>August</b>    | 85,770                           | 1,990                        | 2.3                              |
|              | <b>September</b> | 90,995                           | 5,358                        | 5.9                              |
|              | <b>October</b>   | 109,270                          | 14,181                       | 13.0                             |
|              | <b>November</b>  | 135,434                          | 41,794                       | 30.9                             |
|              | <b>December</b>  | 148,568                          | 59,079                       | 39.8                             |

## REFERENCES

1. Lofgren, E.T., et al., *Disproportional effects in populations of concern for pandemic influenza: insights from seasonal epidemics in Wisconsin, 1967–2004*. Influenza and Other Respiratory Viruses, 2010. 4(4): p. 205-212.
2. Naumova, E.N. and I.B. MacNeill, *Seasonality Assessment for Biosurveillance Systems*, in *Advances in Statistical Methods for the Health Sciences: Applications to Cancer and AIDS Studies, Genome Sequence Analysis, and Survival Analysis*, J.-L. Auget, et al., Editors. 2007, Birkhäuser Boston: Boston, MA. p. 437-450.
